# Supplementary material for: Synthesis and resolution of multi-chiral carbonyl-N embedded hetero[7]helicenes for efficient circularly polarized luminescence
Source: Royal Society of Chemistry journal article supplement (doi:10.1039/d4cc02747g), 2024-01-01
Supplement: d4cc02747g1.pdf [file d4cc02747g1.pdf]

*Supporting Information*

Synthesis and resolution of multi-chiral carbonyl-N embedded hetero[7]helicenes for efficient circularly polarized luminescence

Yuxiang Wang,\* Qi Liao, Yabin Feng, Yiran Wang, Yunzhi Li,\* Qi Meng\*

School of Petrochemical Engineering, Changzhou University, Jiangsu Key Laboratory of Advanced Catalytic Materials and Technology, Changzhou, Jiangsu 213164, P. R. China; Email: wangyx@cczu.edu.cn; mengqi@cczu.edu.cn

School of Chemistry and Chemical Engineering, Linyi University, Linyi, Shandong 276000, P. R. China; Email: liyunzhi@lyu.edu.cn

# Table of Contents

1. Measurements
2. Synthesis procedures of the chiral hetero[7]helicenes
3. Chiral HPLC analysis of the chiral hetero[7]helicenes
4. TGA curves of the chiral hetero[7]helicenes
5. Crystal data of the chiral hetero[7]helicenes
6. Electrochemical properties of the chiral hetero[7]helicenes
7. Photophysical properties of the chiral hetero[7]helicenes
8. Chiroptical properties of the chiral hetero[7]helicenes
9. NMR and HRMS Spectra of all new compounds

## 1. Measurements

Nuclear magnetic resonance (NMR) spectra were recorded on 300 or 400 MHz Bruker spectrometer. Ultraviolet-visible (UV-*vis*) spectra were recorded on Shimadzu UV-1700 UV-*vis* spectrophotometer. Emission spectra were performed on Agilent Cary Eclipse spectrophotometer. The transient photoluminescence (PL) decay spectra and absolute PL quantum yield were determined by Edinburgh FS5 Fluorescence Spectrometer. Circular dichroism (CD) spectra were measured from a JASCO J-810 spectropolarimeter. CPL spectra were measured from a JASCO CPL-300 spectrofluoropolarimeter. Thermogravimetric analysis (TGA) was performed by using a Netzsch TG 209 F3 Tarsus under N<sub>2</sub> atmosphere. Cyclic voltammetry (CV) was measured on a CHI920C (Shanghai CH Instrument Company, China) electrochemical workstation in CH<sub>2</sub>Cl<sub>2</sub> solution at room temperature under N<sub>2</sub> atmosphere, with TBAPF<sub>6</sub> (0.1 M) as supporting electrolyte and a Hg/Hg<sub>2</sub>Cl<sub>2</sub> electrode as a reference electrode. The enantiomeric excesses were confirmed by chiral HPLC using an Agilent Technologies 1260 Infinity with a CHIRALPAK® ZWIX(-)(ZM30LI-CO012) column.

## 2. Synthesis procedures of the chiral hetero[7]helicenes

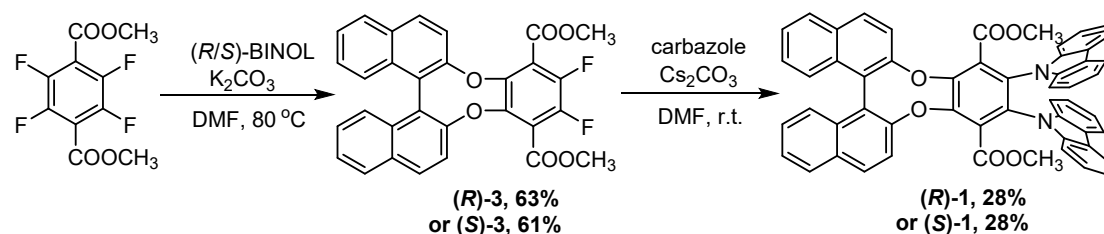

**Scheme S1.** The Synthesis procedures of (*R/S*)-1.

### Synthesis of (*R/S*)-3:

A mixture of (*S*)-BINOL (500.0 mg, 1.75 mmol) and anhydrous potassium carbonate (2.41 g, 10.48 mmol) in dry DMF (10 mL) was stirred for 2 h at room temperature. After addition of a solution of dimethyl 2,3,5,6-tetrafluoroterephthalate (511.2 mg, 1.92 mmol) in dry DMF (5 mL), the mixture was stirred for 12 h under N<sub>2</sub> atmosphere at 80 °C. After cooling to room temperature, the reaction mixture was quenched with water and extracted with ethyl acetate. The organic phase was dried with anhydrous Na<sub>2</sub>SO<sub>4</sub> and the solvent was evaporated. The reaction mixture was purified by column chromatography (petroleum ether/ethyl acetate = 10:1) to afford (*S*)-3 (543.0 mg, 61 %) as white powder. (*R*)-3 (554.0 mg, 63 %) was synthesized in the same procedure from (*R*)-BINOL.

(*S*)-3: <sup>1</sup>H NMR (300 MHz, CDCl<sub>3</sub>): δ 8.02 (d, J = 8.9 Hz, 2H), 7.96 (d, J = 8.3 Hz, 2H), 7.71 (d, J

=8.9 Hz, 2H), 7.53-7.48 (m, 2H), 7.22 (td,  $J_1 = 6.9$  Hz,  $J_2 = 1.2$  Hz 1H), 3.98 (s, 3H).  $^{13}\text{C}$  NMR (400 MHz,  $\text{CDCl}_3$ ):  $\delta$  162.20, 150.22, 145.5, 142.67, 142.07, 132.14, 132.04, 131.27, 128.59, 127.10, 126.79, 126.01, 125.51, 120.92, 53.53. HRMS (ESI, m/z): calcd for  $\text{C}_{30}\text{H}_{19}\text{F}_2\text{O}_6$  [ $\text{M}+\text{H}^+$ ], 531.1144; found, 513.1150. calcd for  $\text{C}_{30}\text{H}_{18}\text{F}_2\text{O}_6\text{Na}$  [ $\text{M}+\text{Na}^+$ ], 535.0964; found, 535.0969.

#### Synthesis of (*R/S*)-1:

A mixture of carbazole (0.75 g, 4.51 mmol) and  $\text{Cs}_2\text{CO}_3$  (1.75 g · 5.37 mmol) in dry DMF (20 mL) was stirred for 2 h at room temperature. After the addition of a solution of (*S*)-3 (1.10 g, 2.15 mmol) in dry DMF (15 mL), the mixture was stirred for 12 h under  $\text{N}_2$  atmosphere at room temperature. After terminated with aqueous ammonium chloride, the reaction mixture was extracted with ethyl acetate and washed with water. The organic phase was dried with anhydrous  $\text{Na}_2\text{SO}_4$  and the solvent was evaporated. The reaction mixture was purified by column chromatography (petroleum ether/dichloroethane = 15:1) to afford (*S*)-1 (480.0 mg, 28 %) as white powder. (*R*)-1 (483 mg, 28 %) was synthesized in the same procedure from (*R*)-3.

(*S*)-1:  $^1\text{H}$  NMR (400 MHz,  $\text{CDCl}_3$ ):  $\delta$  8.15 (d,  $J = 8.8$  Hz, 1H), 8.03 (d,  $J = 7.9$  Hz, 2H), 7.95 (d,  $J = 8.8$  Hz, 2H), 7.70 (d,  $J = 7.7$  Hz, 2H), 7.66-7.63 (m, 1H), 7.55 (t,  $J = 7.5$  Hz, 2H), 7.40(td,  $J_1 = 8.0$  Hz,  $J_2 = 1.0$  Hz, 2H), 7.27 (q,  $J = 8.1$  Hz, 2H), 7.09 (td,  $J_1 = 7.4$  Hz,  $J_2 = 1.0$  Hz, 1H), 7.05-7.03 (m, 1H), 6.97-6.91 (m, 2H), 3.17(s, 3H).  $^{13}\text{C}$  NMR (400 MHz,  $\text{CDCl}_3$ ):  $\delta$  163.98, 150.30, 147.08, 140.67, 140.55, 132.30, 132.18, 132.10, 131.38, 128.63, 127.13, 126.91, 126.09, 125.59, 125.33, 125.13, 123.69, 123.33, 121.31, 120.33, 120.12, 119.81, 119.55, 52.74. HRMS (ESI, m/z): calcd for  $\text{C}_{54}\text{H}_{35}\text{N}_2\text{O}_6^+$  [ $\text{M}+\text{H}^+$ ], 807.2490; found, 807.2493; calcd for  $\text{C}_{54}\text{H}_{34}\text{N}_2\text{NaO}_6^+$  [ $\text{M}+\text{Na}^+$ ], 829.2309; found, 829.2308.

#### Synthesis of DCzAO1 and DCzAO2 from (*R/S*)-1:

(*S*)-1 (500.0 mg, 7.8 mmol) was dissolved in 10 mL ethylene glycol and 5 mL 1.55 M aqueous KOH. The mixture was heated at 120 °C for 24 h. After cooling to room temperature, the reaction mixture was acidified to pH = 2-3 by dilute hydrochloric acid. The precipitated white solid was collected by vacuum filtration, washed thoroughly with water and ethanol, dried under vacuum to afford hydrolysis product (452.0 mg, 99%) which can be used in the next step without further purification.

The hydrolysis product of (*S*)-1 (100.0 mg, 128.4  $\mu\text{mol}$ ) was dispersed in 5 mL anhydrous dichloromethane with the addition of thionyl chloride (93  $\mu\text{L}$ , 1.28 mmol) and two drops of

anhydrous DMF. After 3 h under reflux, anhydrous aluminium chloride (102.7 mg, 770.4  $\mu\text{mol}$ ) was added. After refluxing for 12 h, the reaction mixture was cooled to room temperature, and quenched by adding water dropwise under vigorous stirring. The resulting mixture was diluted with dichloromethane, washed with water and then dried over anhydrous  $\text{Na}_2\text{SO}_4$ . The solvent was evaporated under reduced pressure and the yellow solid product was purified by column chromatography on silica gel (petroleum ether: ethyl acetate = 10:1) to yield the mixture of (*S,P*)-DCzAO1 and (*S,M*)-DCzAO2 as orange solid (42.1 mg, 42 %). (*S,P*)-DCzAO1 and (*S,M*)-DCzAO2 can be identified qualitatively by thin-layer chromatography (petroleum ether: toluene = 1:10, Figure S1) and quantitatively by  $^1\text{H}$  NMR spectrum (Figure S26). The mixture of (*R,M*)-DCzAO1 and (*R,P*)-DCzAO2 were synthesized from (*R*)-1 by the same procedures.

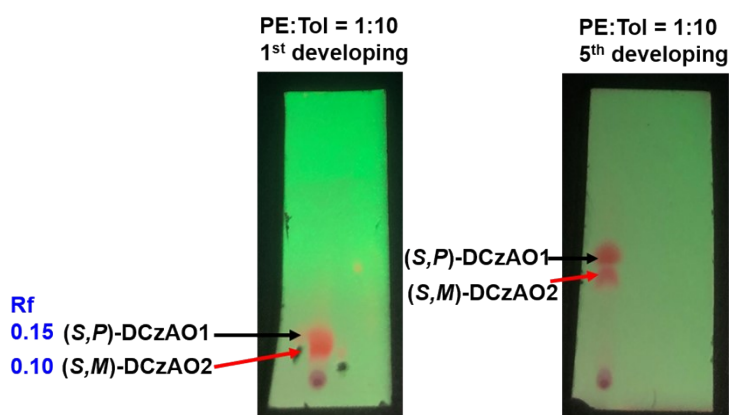

**Figure S1.** TLC analysis of the mixture of (*S,P*)-DCzAO1 and (*S,M*)-DCzAO2.

#### Synthesis of DCzAO1 and DCzAO2 from (*R/S*)-2:

(*R/S*)-2 was synthesized according to literature reported procedure (*J. Am. Chem. Soc.*, 2016, **138**, 3990-3993). To a solution of (*R/S*)-2 (600.0 mg, 0.81 mmol) in 50 mL 1,2-dichloroethane was added triflic acid (1.94 mL, 24.3 mmol). The reaction mixture was stirred at room temperature for 12 h and monitored by TLC. After the full consumption of (*R/S*)-2, 25 mL water and 25 mL dioxane were added to the reaction mixture. After hydrolyzed at 80°C for 12 h, the reaction mixture was extracted with dichloromethane and washed with water. The organic phase was separated, dried over anhydrous  $\text{Na}_2\text{SO}_4$  and evaporated under reduced pressure. The residual was purified by column chromatography on silica gel (petroleum ether: ethyl acetate = 10:1) to yield the mixture of (*R,M*)-DCzAO1 and (*R,P*)-DCzAO2 (394.0 mg, 65 %) or the mixture of (*S,P*)-DCzAO1 and (*S,M*)-DCzAO2 (382.0 mg, 64 %) as orange solid.

#### Separation of DCzAO1 and DCzAO2:

The mixture of **(S,P)-DCzAO1** and **(S,M)-DCzAO2** (350 mg) was dissolved in 40 mL ethyl acetate under reflux. **(S,P)-DCzAO1** (104.5 mg) was obtained after cooling, crystallization and filtration. The residual solution was evaporated and the second part of **(S,P)-DCzAO1** 103.0 mg could be recrystallized from 15 mL ethyl acetate. The totally separated amount of **(S,P)-DCzAO1** was 207.5 mg with 89 % recovery. Then 1,2-dichloroethane and n-hexane (3 mL, 1/1, v/v) were used in the recrystallization of the residual to yield **(S,M)-DCzAO2** as orange solid (69.0 mg, 59 % recovery). **(R,M)-DczAO1** (207.6 mg, 90 % recovery) and **(R,P)-DczAO2** (70.5 mg, 61 % recovery) were separated by the similar procedure from the mixture of **(R,M)-DczAO1** and **(R,P)-DczAO2** (346.7 mg).

**(S,P)-DCzAO1**:  $^1\text{H}$  NMR (400 MHz,  $\text{CDCl}_3$ ):  $\delta$  8.47 (dd,  $J_1 = 7.8$  Hz,  $J_2 = 0.6$  Hz, 1H), 8.33 (d,  $J = 7.4$  Hz, 1H), 8.02 (d,  $J = 8.8$  Hz, 1H), 7.95 (t,  $J = 8.8$  Hz, 2H), 7.86 (d,  $J = 7.6$  Hz, 1H), 7.71 (t,  $J_1 = 7.0$  Hz, 2H), 7.50 (t,  $J = 7.4$  Hz, 2H), 7.41 (t,  $J = 7.7$  Hz, 2H), 7.01 (t,  $J = 7.32$  Hz, 1H), 6.71 (t,  $J = 7.9$  Hz, 1H), 6.23 (d,  $J = 8.4$  Hz, 1H).  $^{13}\text{C}$  NMR (75 MHz,  $\text{C}_6\text{D}_6$ ):  $\delta$  176.73, 152.06, 146.60, 138.95, 137.17, 132.69, 132.40, 131.21, 128.83, 127.59, 126.39, 126.70, 126.49, 125.27, 124.71, 123.55, 123.36, 122.10, 121.23, 121.02, 120.79, 112.07. HRMS (ESI, m/z): calcd for  $\text{C}_{52}\text{H}_{27}\text{N}_2\text{O}_4$  [ $\text{M}+\text{H}^+$ ], 743.1965; found, 743.19695; calcd for  $\text{C}_{52}\text{H}_{26}\text{N}_2\text{NaO}_4$  [ $\text{M}+\text{Na}^+$ ], 765.1785; found, 765.17800.

**(S,M)-DCzAO2**:  $^1\text{H}$  NMR (400 MHz,  $\text{CDCl}_3$ ):  $\delta$  8.54 (dd,  $J_1 = 7.8$  Hz,  $J_2 = 0.8$  Hz, 1H), 8.38 (dd,  $J = 7.46$  Hz,  $J_2 = 0.8$  Hz, 1H), 7.91 (t,  $J = 8.96$  Hz, 3H), 7.77 (t,  $J = 7.7$  Hz, 1H), 7.71 (d,  $J = 8.84$  Hz, 2H), 7.48 (td,  $J_1 = 6.9$  Hz,  $J_2 = 1.2$  Hz, 1H), 7.40 (td,  $J_1 = 7.7$  Hz,  $J_2 = 1.3$  Hz, 1H), 7.02 (t,  $J = 7.96$  Hz, 1H), 6.71 (t,  $J = 7.9$  Hz, 1H), 6.23 (d,  $J = 8.4$  Hz, 1H).  $^{13}\text{C}$  NMR (75 MHz,  $\text{CDCl}_3$ ):  $\delta$  177.28, 151.05, 147.18, 139.33, 137.68, 132.33, 131.99, 130.66, 128.38, 127.27, 126.92, 126.56, 126.18, 126.09, 125.97, 125.45, 124.77, 124.52, 123.24, 122.95, 121.36, 121.10, 112.09. HRMS (ESI, m/z): calcd for  $\text{C}_{52}\text{H}_{27}\text{N}_2\text{O}_4$  [ $\text{M}+\text{H}^+$ ], 743.1965; found, 743.19633; calcd for  $\text{C}_{52}\text{H}_{26}\text{N}_2\text{NaO}_4$  [ $\text{M}+\text{Na}^+$ ], 765.1785; found, 765.17819.

### 3. Chiral HPLC analysis of the chiral hetero[7]helicenes

The enantiomeric excesses (*ee*) were confirmed by chiral HPLC using an Agilent 1260 Infinity instrument with a Daicel CHIRALPAK® ZWIX(-)(ZM30LI-CO012) column. Mobile phase: MeOH/ACN = 75/25 (v/v) + (50 mM Formic acid + 25 mM Diethylamine), sample solution: 0.1 mg/mL in THF/Water = 80/20 (v/v), solvent flow rate: 0.4 mL/min, detector wavelength: 254 nm.

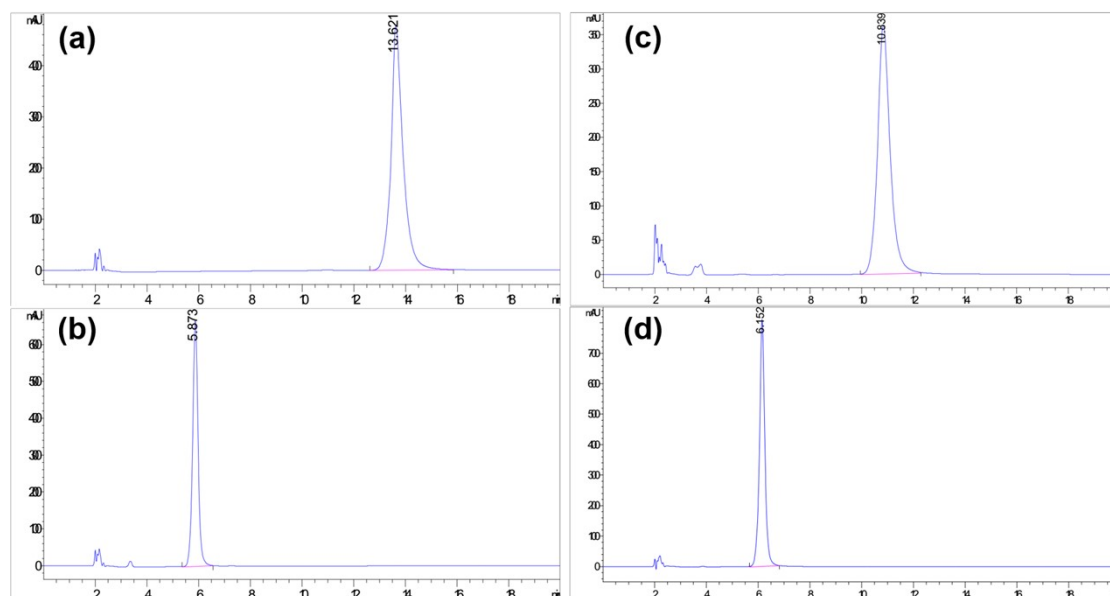

**Figure S2.** Chiral HPLC spectra of (a) (*R,M*)-DCzAO1, (b) (*S,P*)-DCzAO1, (c) (*R,P*)-DCzAO2 and (d) (*S,M*)-DCzAO2.

**Table S1.** Chiral HPLC data of the chiral hetero[7]helicenes.

| Compound              | Ret. Time (min) | Area (a.u.) | Area (%) | <i>ee</i> (%) |
|-----------------------|-----------------|-------------|----------|---------------|
| ( <i>R,M</i> )-DCzAO1 | 13.621          | 15619.630   | 100      | 100           |
| ( <i>S,P</i> )-DCzAO1 | 5.873           | 9801.824    | 100      | 100           |
| ( <i>R,P</i> )-DCzAO2 | 10.839          | 12369.865   | 100      | 100           |
| ( <i>S,M</i> )-DCzAO2 | 6.152           | 11723.072   | 100      | 100           |

#### 4. TGA curves of the chiral hetero[7]helicenes

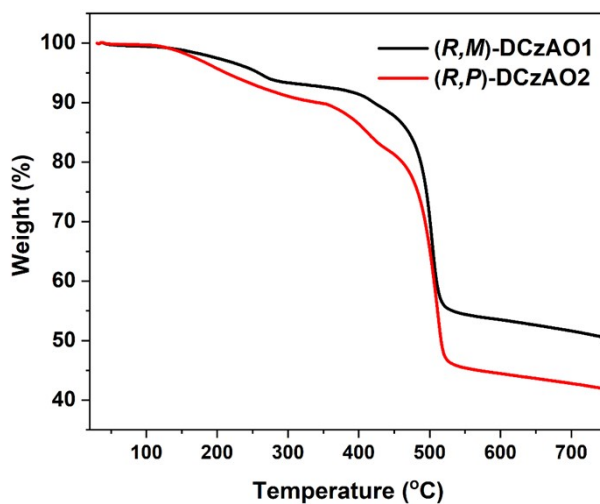

**Figure S3.** The TGA curves of (*R,M*)-DCzAO1 and (*R,P*)-DCzAO2.

#### 5. Crystal data of the chiral hetero[7]helicenes

The single crystals of (*R,M*)-DCzAO1 and (*R,P*)-DCzAO2 were obtained by volatilizing the solution in CH<sub>2</sub>Cl<sub>2</sub>/Hexane at room temperature. X-ray data at 100 K were examined on a Bruker SMART APEX II Single-Crystal X-Ray Diffractometer using MoK $\alpha$  radiation ( $\lambda = 0.71073$  Å). The structures were solved by direct methods and refined with the full-matrix least square technique. The details of crystal data and structure refinement were presented in Table S2. The crystal data of (*R,M*)-DCzAO1 and (*R,P*)-DCzAO2 were deposited to CCDC with CCDC number of 2314296 and 2314297.

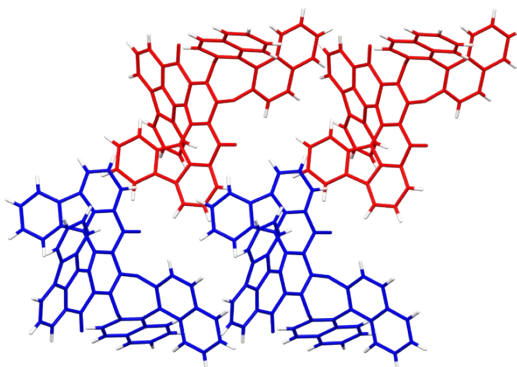

**Figure S4.** Molecular packing of (*R,M*)-DCzAO1 in the single crystal, the molecules in the alternating parallel layers with different orientations were colored in different colors.



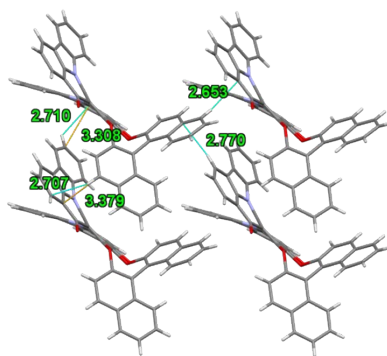

**Figure S5.** Intermolecular C-H $\cdots$  $\pi$  (blue line) and C $\cdots$ C (orange line) interactions in the stacking structures of (*R,M*)-DCzAO1.

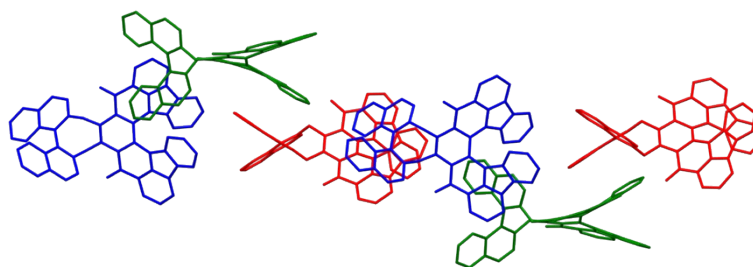

**Figure S6.** Molecular packing of (*R,P*)-DCzAO2 in the single crystal, the molecules in the alternating parallel layers with different orientations were colored in different colors.

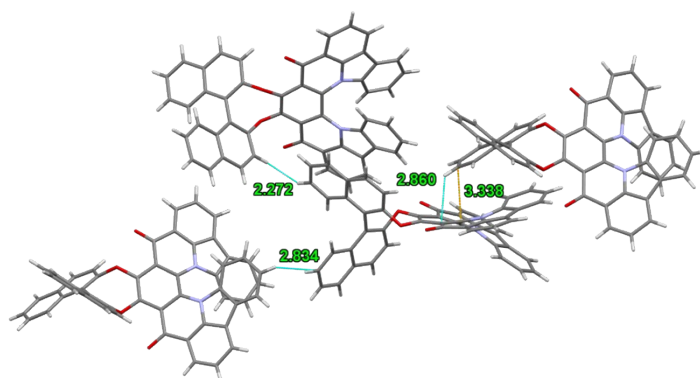

**Figure S7.** Intermolecular C-H $\cdots$  $\pi$  (blue line) and C $\cdots$ C (orange line) interactions in the stacking structures of (*R,P*)-DCzAO2.

**Table S2.** Crystal data and structure refinement for the chiral hetero[7]helicenes.

| Compound                                    | <b>(<i>R,M</i>)-DCzAO1</b>                                       | <b>(<i>R,P</i>)-DCzAO2</b>                                       |
|---------------------------------------------|------------------------------------------------------------------|------------------------------------------------------------------|
| CCDC                                        | 2314296                                                          | 2314297                                                          |
| Empirical formula                           | C <sub>52</sub> H <sub>26</sub> N <sub>2</sub> O <sub>4</sub>    | C <sub>52</sub> H <sub>26</sub> N <sub>2</sub> O <sub>4</sub>    |
| Formula weight                              | 742.7893                                                         | 742.7893                                                         |
| Temperature/K                               | 100                                                              | 100                                                              |
| Crystal system                              | monoclinic                                                       | hexagonal                                                        |
| Space group                                 | P2 <sub>1</sub>                                                  | P6 <sub>1</sub>                                                  |
| a/Å                                         | 8.1505(5)                                                        | 13.1642(13)                                                      |
| b/Å                                         | 11.3911(8)                                                       | 13.1642(13)                                                      |
| c/Å                                         | 20.8223(13)                                                      | 48.250(6)                                                        |
| α/°                                         | 90                                                               | 90                                                               |
| β/°                                         | 92.329(2)                                                        | 90                                                               |
| γ/°                                         | 90                                                               | 120                                                              |
| Volume/Å <sup>3</sup>                       | 1931.6(2)                                                        | 7241.3(17)                                                       |
| Z                                           | 2                                                                | 6                                                                |
| ρ <sub>calc</sub> g/cm <sup>3</sup>         | 1.423                                                            | 1.259                                                            |
| μ/mm <sup>-1</sup>                          | 0.223                                                            | 0.078                                                            |
| F(000)                                      | 852.0                                                            | 2904.0                                                           |
| Crystal size/mm <sup>3</sup>                | 0.12 × 0.04 × 0.02                                               | 0.12 × 0.08 × 0.04                                               |
| Radiation                                   | MoKα (λ = 0.71073)                                               | MoKα (λ = 0.71073)                                               |
| 2θ range for data collection/°              | 3.916 to 52.83                                                   | 4.38 to 52.736                                                   |
| Index ranges                                | -10 ≤ h ≤ 10,<br>-12 ≤ k ≤ 14,<br>-26 ≤ l ≤ 26                   | -16 ≤ h ≤ 15,<br>-11 ≤ k ≤ 16,<br>-52 ≤ l ≤ 57                   |
| Reflections collected                       | 14940                                                            | 33338                                                            |
| Independent reflections                     | 6770 [R <sub>int</sub> = 0.0753,<br>R <sub>sigma</sub> = 0.1027] | 9239 [R <sub>int</sub> = 0.1303,<br>R <sub>sigma</sub> = 0.1497] |
| Data/restraints/parameters                  | 6770/1/550                                                       | 9239/888/681                                                     |
| Goodness-of-fit on F <sup>2</sup>           | 1.051                                                            | 0.991                                                            |
| Final R indexes [I ≥ 2σ (I)]                | R <sub>1</sub> = 0.0589,<br>wR <sub>2</sub> = 0.1223             | R <sub>1</sub> = 0.0754,<br>wR <sub>2</sub> = 0.1612             |
| Final R indexes [all data]                  | R <sub>1</sub> = 0.0922,<br>wR <sub>2</sub> = 0.1453             | R <sub>1</sub> = 0.1582,<br>wR <sub>2</sub> = 0.2032             |
| Largest diff. peak/hole / e Å <sup>-3</sup> | 0.44/-0.31                                                       | 0.39/-0.32                                                       |
| Flack parameter                             | 0.08(8)                                                          | -0.8(10)                                                         |

## 6. Electrochemical properties of the chiral hetero[7]helicenes

**Table S3.** Electrochemical properties of the chiral hetero[7]helicenes

|                            | $E_{\text{OX}}$<br>[V] | ${}^a E_{\text{HOMO}}$<br>[eV] | ${}^b E_{\text{g,opt}}$<br>[eV] | ${}^c E_{\text{LUMO}}$<br>[eV] |
|----------------------------|------------------------|--------------------------------|---------------------------------|--------------------------------|
| <b>(<i>R,M</i>)-DCzAO1</b> | 0.60                   | -5.07                          | 2.34                            | -2.73                          |
| <b>(<i>R,P</i>)-DCzAO2</b> | 0.48                   | -4.95                          | 2.30                            | -2.65                          |

$${}^a E_{\text{HOMO}} = -[E_{\text{OX}} - E_{(\text{Fc}/\text{Fc}^+)} + 4.8] \text{ eV}; \quad {}^b E_{\text{g,opt}} = 1240/\lambda_{\text{onset}}; \quad {}^c E_{\text{LUMO}} = E_{\text{g,opt}} + E_{\text{HOMO}}$$

## 7. Photophysical Properties of the chiral hetero[7]helicenes

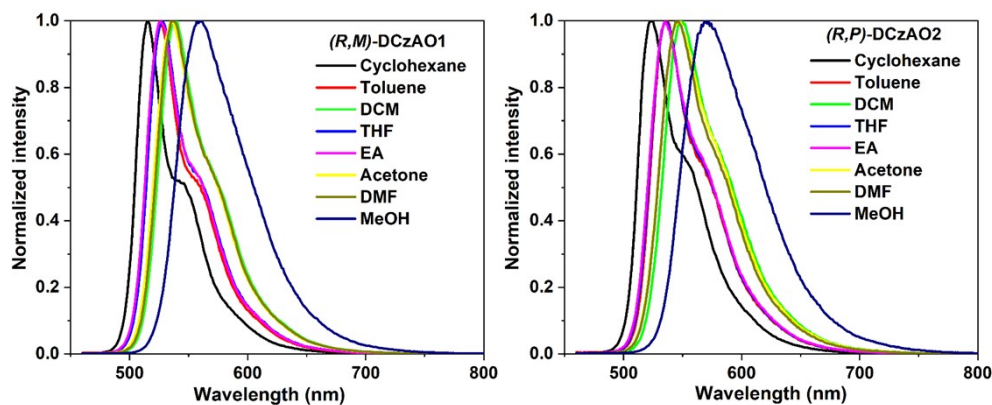

**Figure S8.** Solvatochromic PL spectra of (*R,M*)-DCzAO1 and (*R,P*)-DCzAO2 ( $\lambda_{\text{ex}} = 450 \text{ nm}$ ,  $1 \times 10^{-5} \text{ M}$ ).

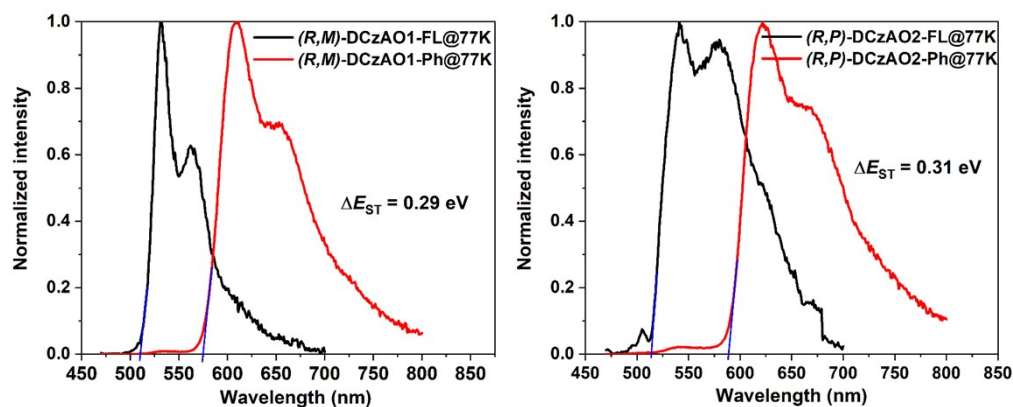

**Figure S9.** Fluorescence and phosphorescence spectra of (*R,M*)-DCzAO1 and (*R,P*)-DCzAO2 in toluene solutions at 77 K ( $1 \times 10^{-5} \text{ M}$ ).

**The preparation procedure of the doped films:** The doped films in this work were prepared by drop-casting. To be specific, 5 mg of chiral hetero[7]helicene and 95 mg of PMMA (purchased from Energy Chemical Co., average Mw 20 kDa) were dissolved in 5 mL of toluene. The obtained solution (50  $\mu$ L) was drop-casted onto the quartz plate (1 mm  $\times$  10 mm  $\times$  40 mm). After annealing at 80  $^{\circ}$ C for 2 h, the resulting doped films were subjected to the following tests.

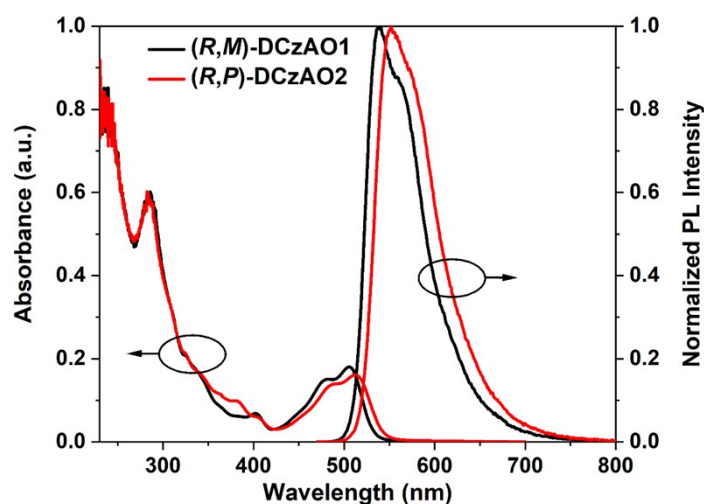

**Figure S10.** Absorption and PL spectra of (*R,M*)-DCzAO1 and (*R,P*)-DCzAO2 in doped films (5 wt% in PMMA).

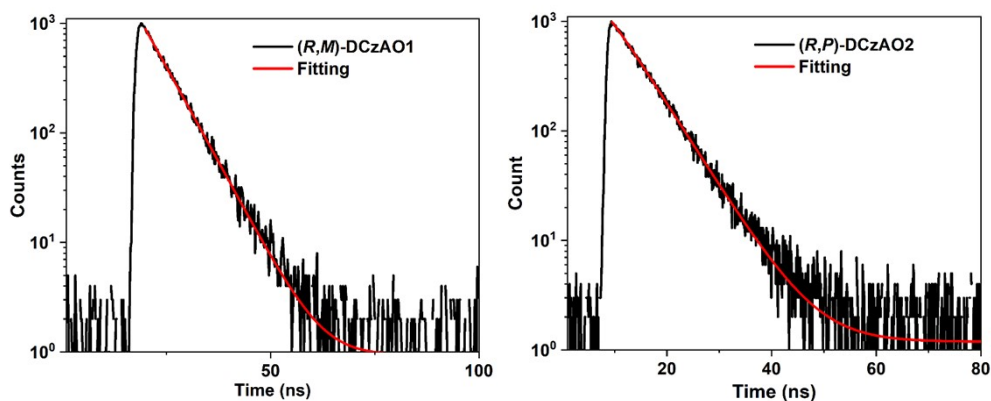

**Figure S11.** Transient PL spectra of (*R,M*)-DCzAO1 and (*R,P*)-DCzAO2 in toluene solutions ( $1 \times 10^{-5}$  M).

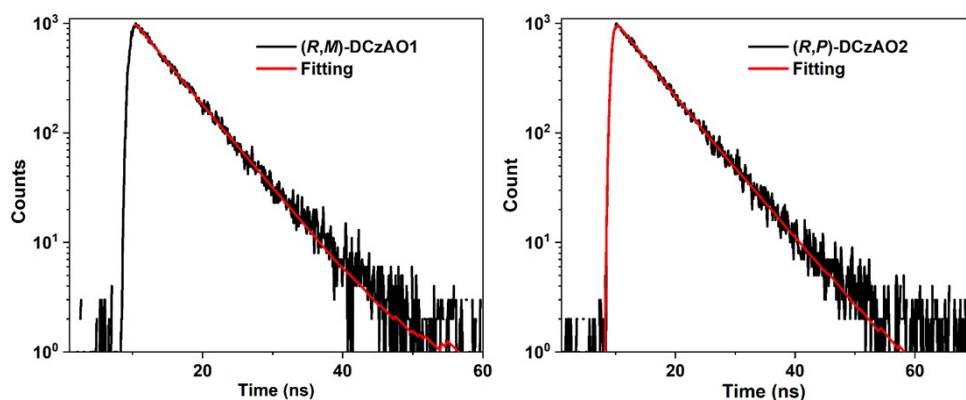

**Figure S12.** Transient PL spectra of *(R,M)*-DCzAO1 and *(R,P)*-DCzAO2 in doped films (5 wt% in PMMA).

**Table S4.** The photophysical data of *(R,M)*-DCzAO1 and *(R,P)*-DCzAO2.

| compound                          | $\lambda_{\text{abs}}$<br>(nm) | $\lambda_{\text{em}}$<br>(nm) | $\Phi_{\text{PL}}$<br>(%) | $\tau$<br>(ns) | FWHM<br>(nm) | $\Delta E_{\text{ST}}$<br>(eV) |
|-----------------------------------|--------------------------------|-------------------------------|---------------------------|----------------|--------------|--------------------------------|
| <i>(R,M)</i> -DCzAO1 <sup>a</sup> | 402, 479,<br>506               | 525                           | 57                        | 6.2            | 47           | 0.29                           |
| <i>(R,M)</i> -DCzAO1 <sup>b</sup> | 284, 404,<br>480, 505          | 538                           | 50                        | 5.9            | 68           |                                |
| <i>(R,P)</i> -DCzAO2 <sup>a</sup> | 404, 487,<br>513               | 535                           | 55                        | 5.5            | 53           | 0.31                           |
| <i>(R,P)</i> -DCzAO2 <sup>b</sup> | 283, 382,<br>486, 513          | 553                           | 47                        | 7.3            | 73           |                                |

<sup>a</sup>In toluene solutions ( $1 \times 10^{-5}$  M). <sup>b</sup>In doped films (5 wt% in PMMA).

## 8. Chiroptical properties of the chiral hetero[7]helicenes

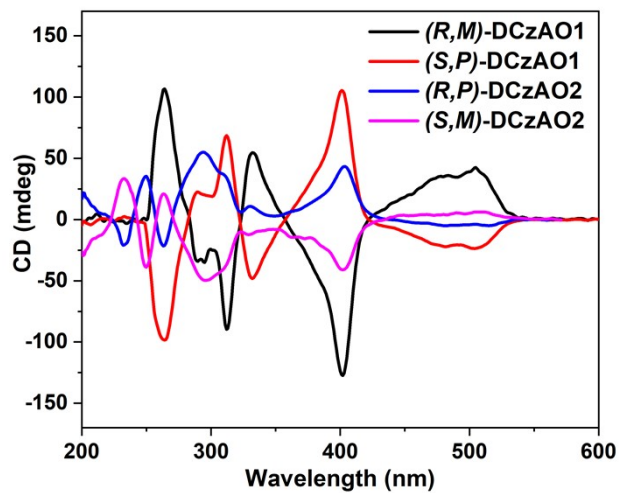

Figure S13. CD spectra of the chiral hetero[7]helicenes in doped films (5 wt% in PMMA).

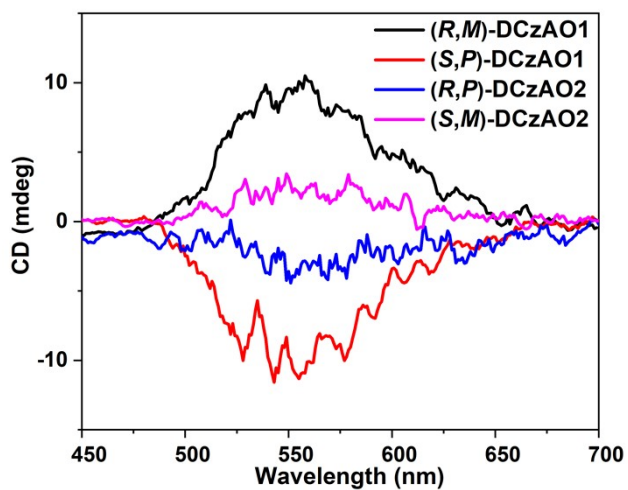

Figure S14. CPL spectra of the chiral hetero[7]helicenes in doped films (5 wt% in PMMA).

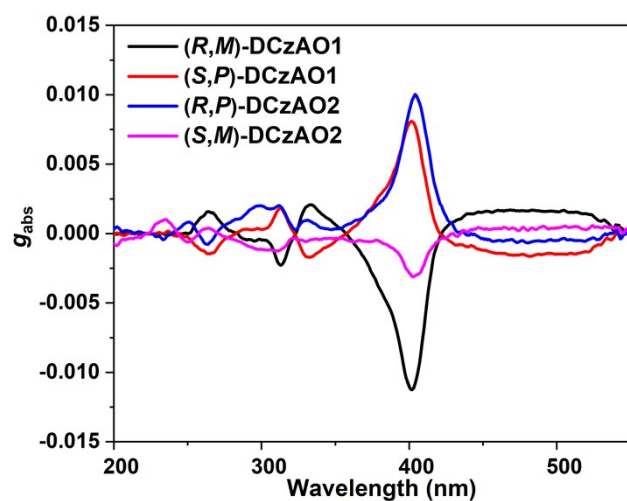

**Figure S15.** Curves of  $g_{\text{abs}}$  values versus wavelength for the chiral hetero[7]helicenes in doped films (5 wt% in PMMA).

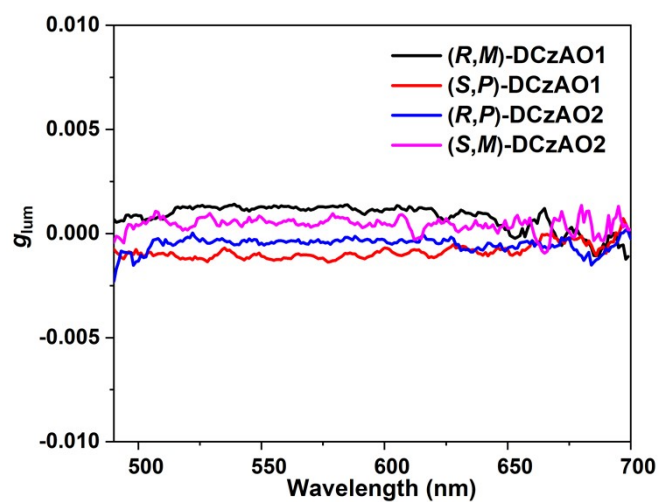

**Figure S16.** Curves of  $g_{\text{lum}}$  values versus wavelength for the chiral hetero[7]helicenes in doped films (5 wt% in PMMA).

**Table S5.** The chiroptical parameters of the chiral hetero[7]helicenes.

| Compound                   | toluene solution              |                                   |                                |                                   | doped film                    |                                   |                                |                                   |
|----------------------------|-------------------------------|-----------------------------------|--------------------------------|-----------------------------------|-------------------------------|-----------------------------------|--------------------------------|-----------------------------------|
|                            | $\lambda_{\text{CD}}$<br>(nm) | $g_{\text{abs}}$<br>( $10^{-3}$ ) | $\lambda_{\text{CPL}}$<br>(nm) | $g_{\text{lum}}$<br>( $10^{-3}$ ) | $\lambda_{\text{CD}}$<br>(nm) | $g_{\text{abs}}$<br>( $10^{-3}$ ) | $\lambda_{\text{CPL}}$<br>(nm) | $g_{\text{lum}}$<br>( $10^{-3}$ ) |
| <b>(<i>R,M</i>)-DCzAO1</b> | 504                           | 2.0                               | 550                            | 1.4                               | 513                           | 1.5                               | 527                            | 1.3                               |
| <b>(<i>S,P</i>)-DCzAO1</b> |                               | -1.9                              |                                | -1.3                              |                               | -1.5                              |                                | -1.3                              |
| <b>(<i>R,P</i>)-DCzAO2</b> | 516                           | -0.70                             | 555                            | -0.5                              | 512                           | -0.5                              | 553                            | -0.5                              |
| <b>(<i>S,M</i>)-DCzAO2</b> |                               | 0.70                              |                                | 0.8                               |                               | 0.5                               |                                | 0.6                               |

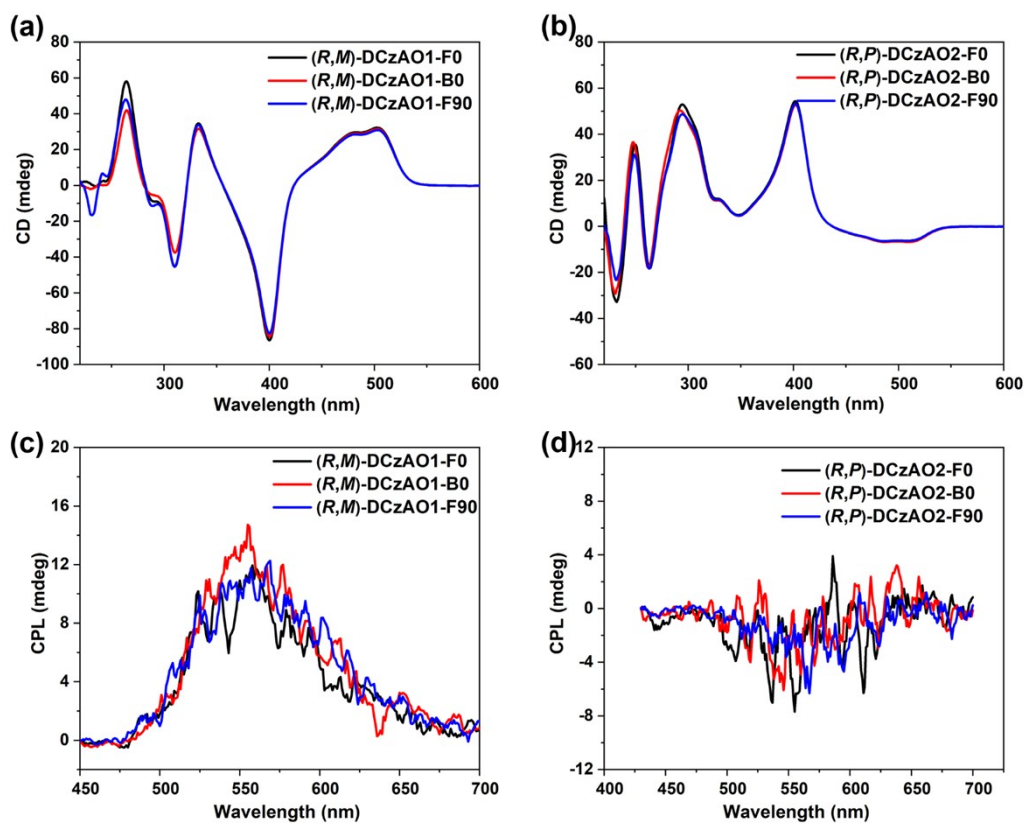

**Figure S17.** The CD and CPL spectra of the chiral hetero[7]helicenes in doped films (5 wt% in PMMA) from different sides and rotation angles, F0: front side 0° rotation, B0: back side 0° rotation, F90: front side 90° rotation.



## 9. NMR and HRMS Spectra of all new compounds

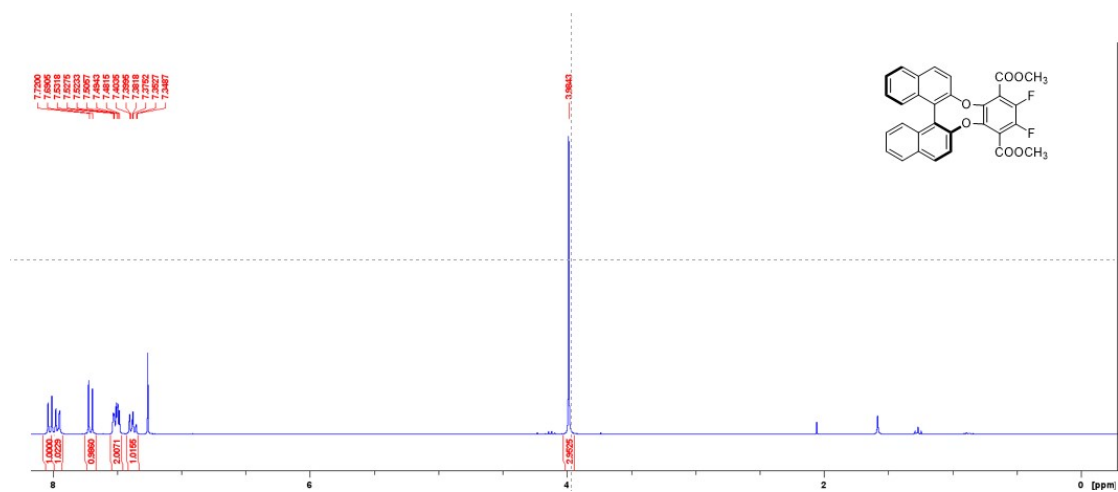

Figure S18. <sup>1</sup>H NMR spectrum of S-2 (400 MHz, CDCl<sub>3</sub>).

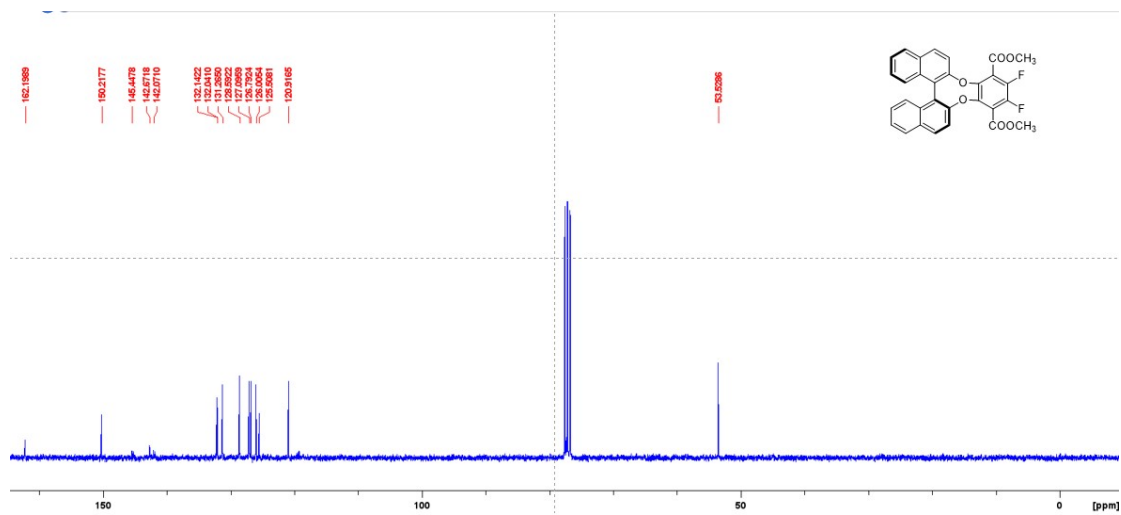

Figure S19. <sup>13</sup>C NMR spectrum of S-2 (75 MHz, CDCl<sub>3</sub>)

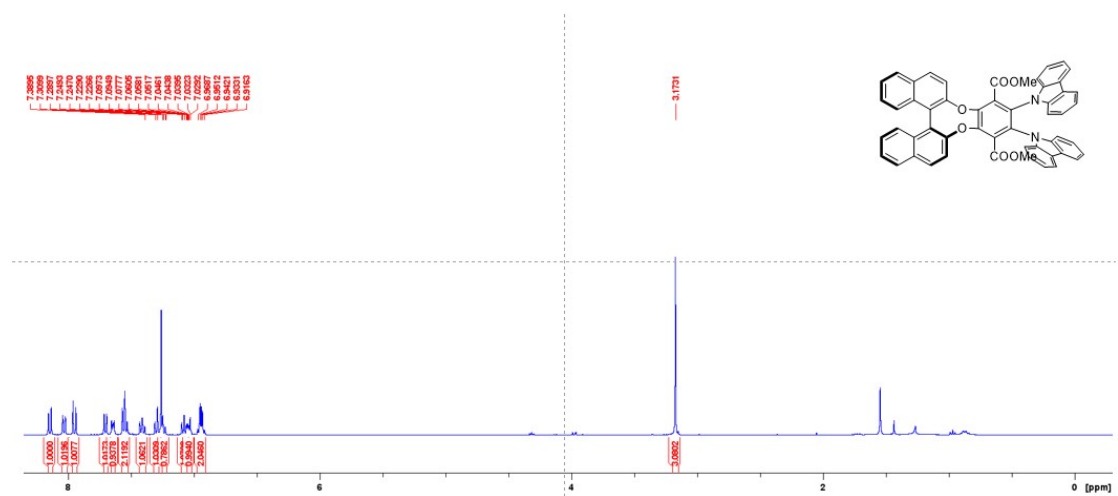

Figure S20. <sup>1</sup>H NMR spectrum of S-3 (400 MHz, CDCl<sub>3</sub>).



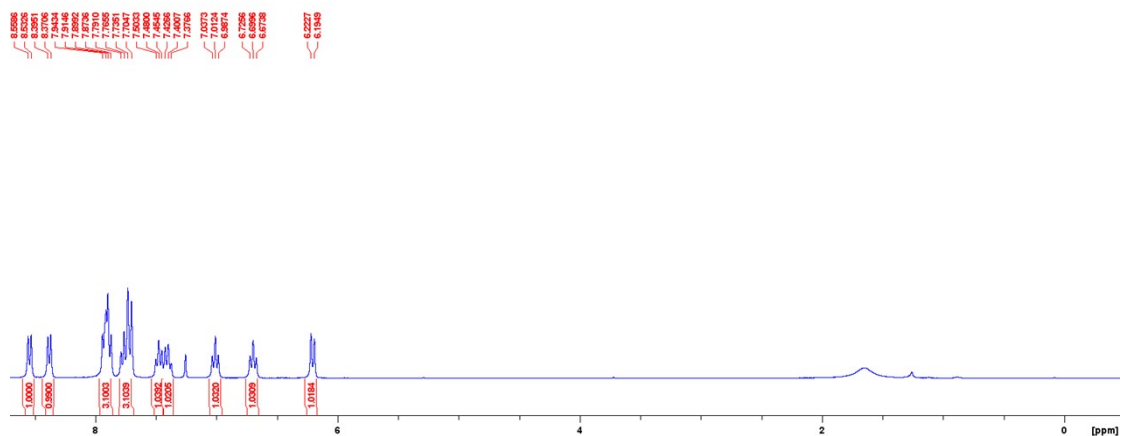

Figure S24.  $^1\text{H}$  NMR spectrum of (*S,M*)-DCzAO2 (300 MHz,  $\text{CDCl}_3$ ).

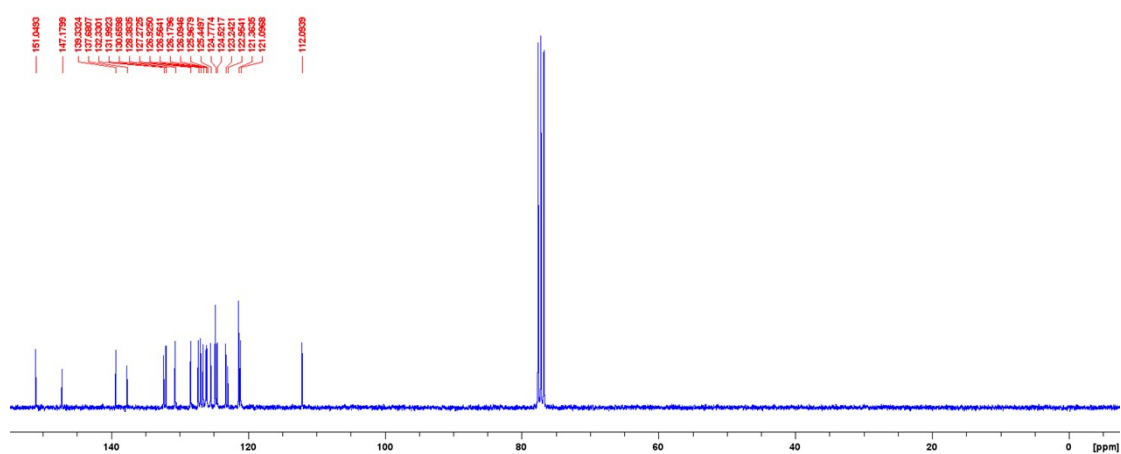

Figure S25.  $^{13}\text{C}$  NMR spectrum of (*S,M*)-DCzAO2 (75 MHz,  $\text{CDCl}_3$ ).

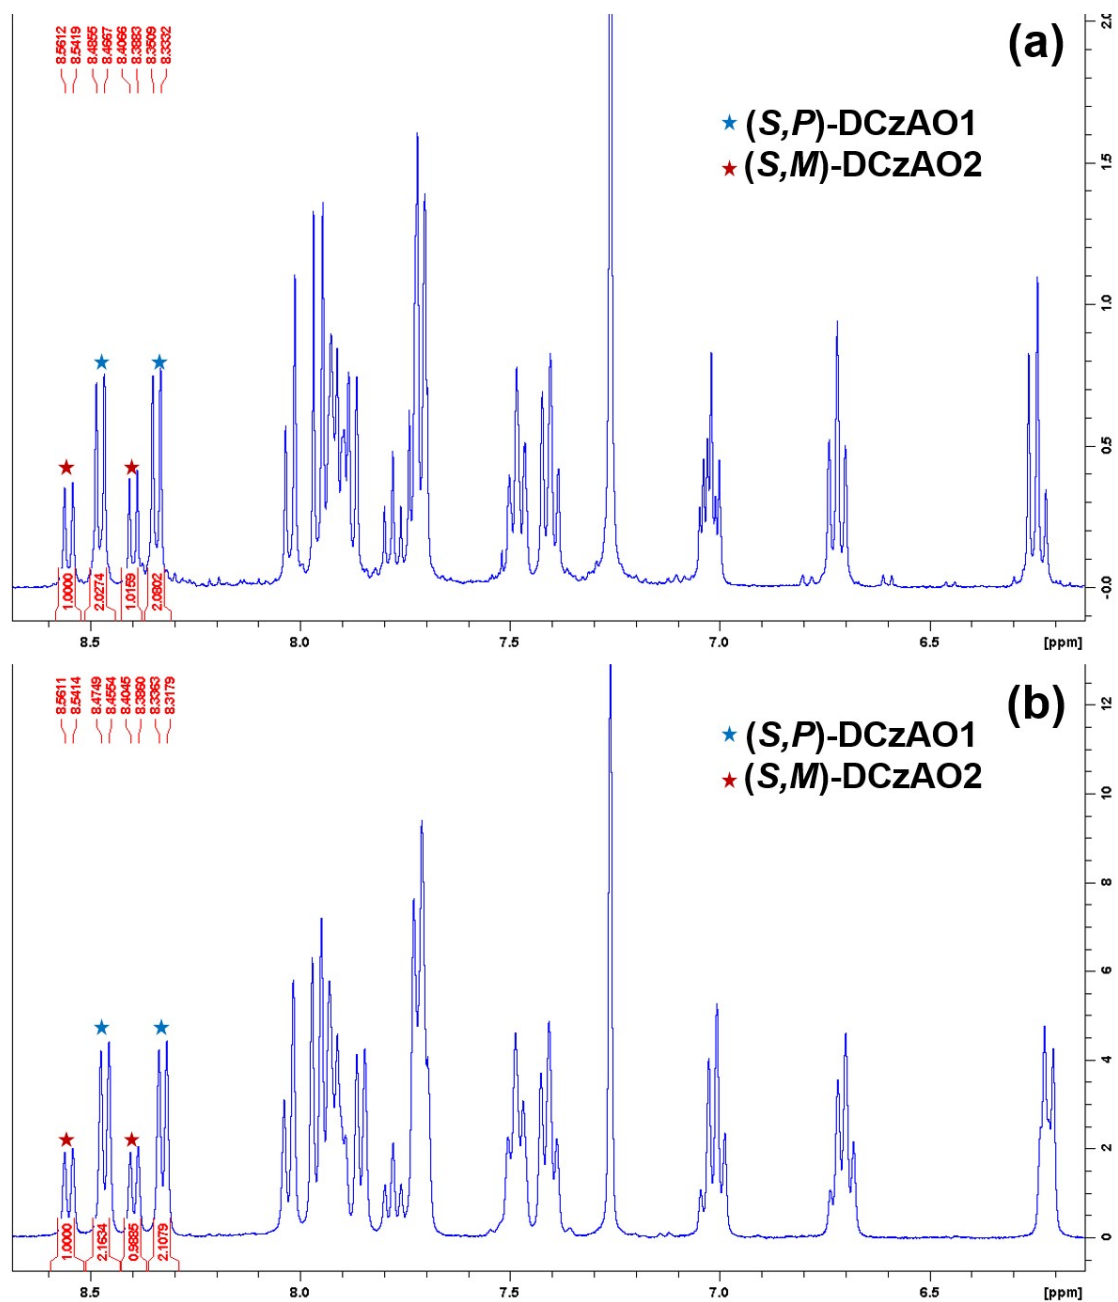

**Figure S26.**  $^1\text{H}$  NMR spectrum (400 MHz,  $\text{CDCl}_3$ ) for the mixture of (*S,P*)-DCzAO1 and (*S,M*)-DCzAO2 acquired from (a) route A and (b) route B.

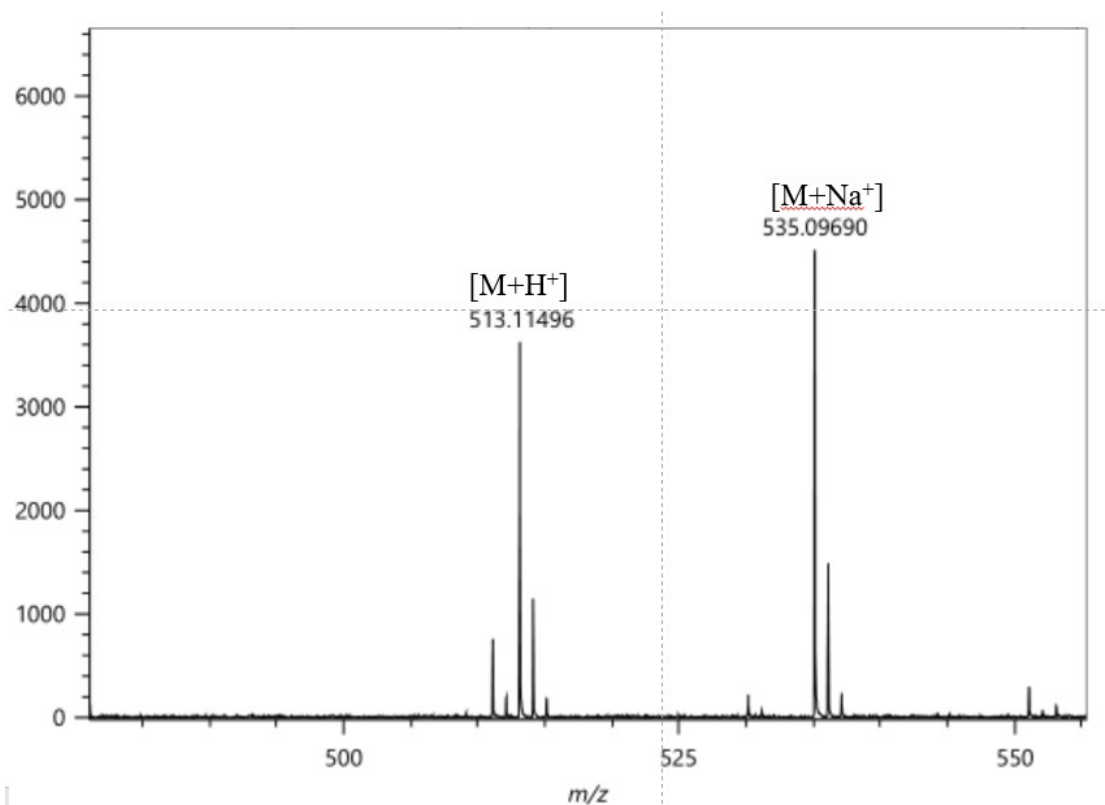

**Figure S27.** HRMS spectra of *S-2*.

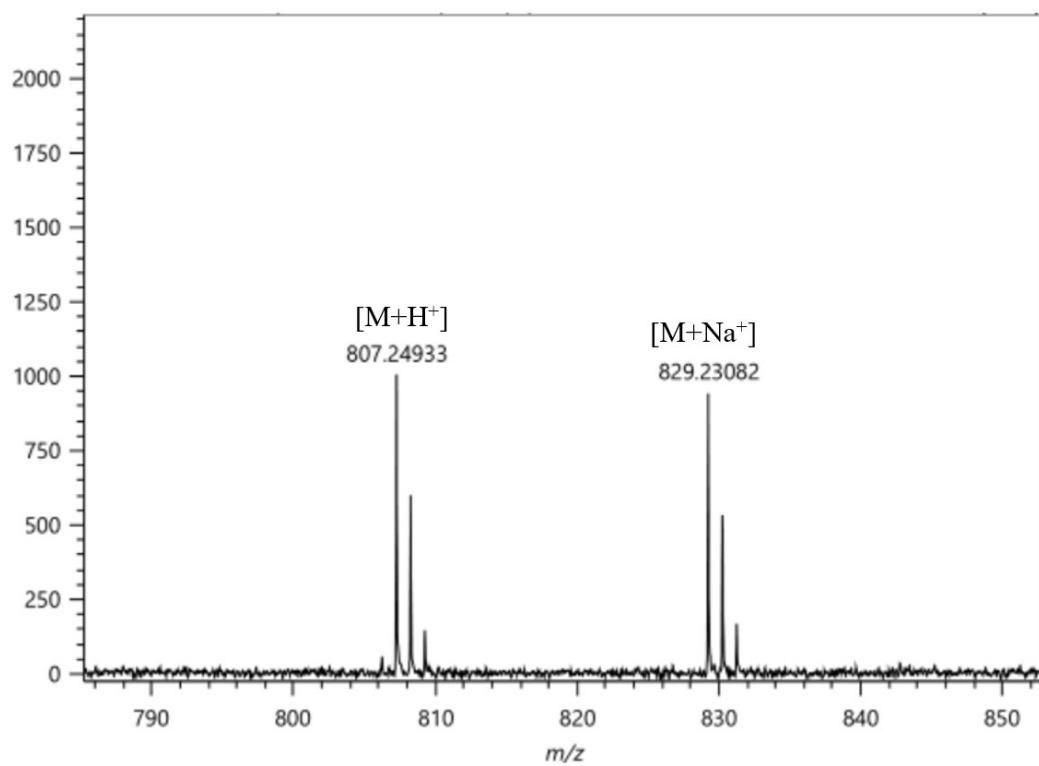

**Figure S29.** HRMS spectra of *S-3*.

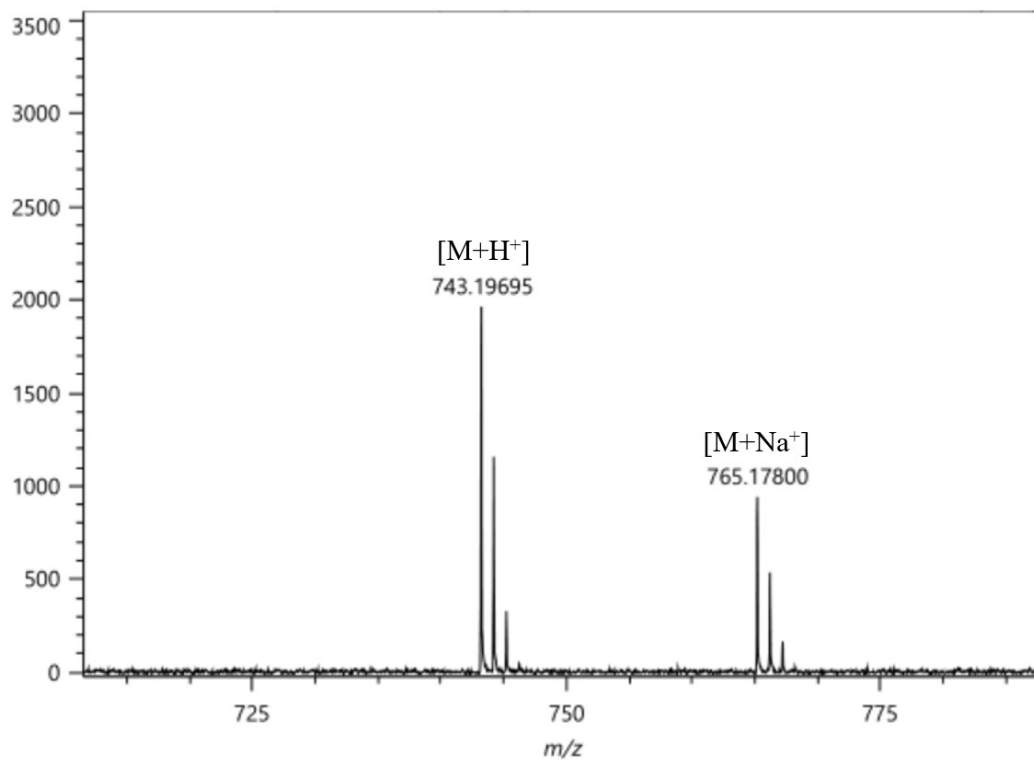

**Figure S29.** HRMS spectra of (*S,M*)-DCzAO1

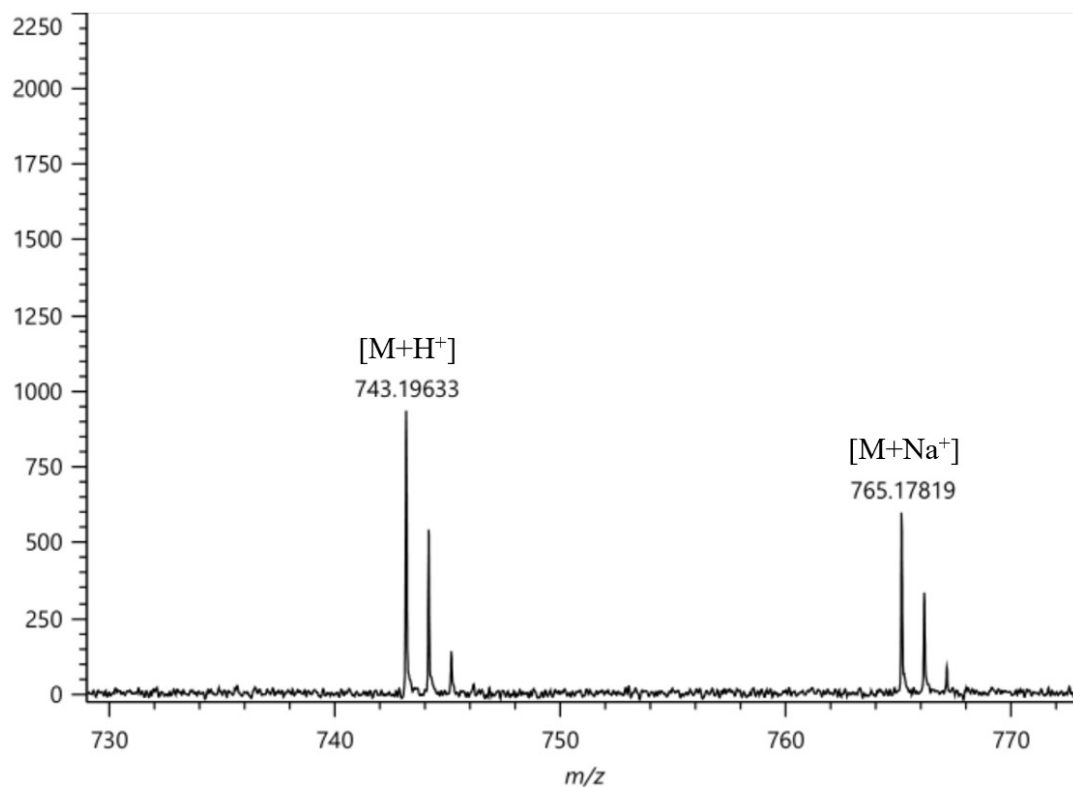

**Figure S30.** HRMS spectra of (*S,P*)-DCZAO2.
